# Supplementary material for: Stunting at birth and associated factors among newborns delivered at the University of Gondar Comprehensive Specialized Referral Hospital
Source: PLoS One. 2021 Jan 20;16(1):e0245528. doi: 10.1371/journal.pone.0245528 (PMC7817059; doi:10.1371/journal.pone.0245528)
Supplement: S1 File — (DOC) [file pone.0245528.s001.doc]

Stunting at birth and associated factors among newborns delivered at the University of Gondar Comprehensive Specialized Referral Hospital.

Almaz Tefera Gonete1, Bogale Kassahun2, Eskedar Getie Mekonnen3, Wubet Worku Takele4 **1, 2**Department of Pediatrics and Child Health Nursing, School of Nursing, College of Medicine and Health Sciences, University of Gondar, Gondar, Ethiopia.

3Department of Reproductive and Child Health, Institute of Public Health, College of Medicine and Health Sciences, University of Gondar, Gondar, Ethiopia.

4Department of Community Health Nursing, School of Nursing College of Medicine and Health Sciences, University of Gondar, Gondar, Ethiopia.

**Corresponding author: Almaz Tefera Gonete**

**Email:** almazteferag3@gmail.com **Authors email adress:**

AT: almazteferag3@gmail.com

BK: bogalekassahun22@gmail.com

EGM: eskedargetie18@gmail.com

WWT: wubetakele380@gmail.com

**9.3. Annex 3: Data collection tool**

A structured and semi structured questionnaire prepared for the collection of socio-demographic, maternal, and newborn related information to assess prevalence and factors of stunting at birth among newborn-mother pairs delivered at the University of Gondar Comprehensive Specialized Referral Hospital, North West Ethiopia 2020.

**Code No. _________.**

| **Ser.**  **No.** | **Part I: Maternal Baseline Socio-demographic characteristics** | | **Skip** |
| --- | --- | --- | --- |
| 101 | How old are you? | …………………………in year |  |
| 102 | What is your religion? | 1.Orthodox   1. Muslim 2. Catholic   4.protestant  5. Others (Specify)… |  |
| 103 | Where do you live? | 1.Urban 2.Rural |  |
| 104 | What is your ethnicity? | 1. Amhara 2. Oromo 3. Tigray 4. Others (specify)......... |  |
| 105 | What is your marital status? | 1. Married 2. Single 3. Divorced 4. Widowed 5. Separated |  |
| 106 | Father’s educational status | 1.Unable to read and write |  |
|  |  | 2.read and write   1. Primary school(1-8) 2. Secondary school(9-12)   5.College and above |  |
| 107 | Mother’s educational status | 1. Unable To Read And Write 2. Read And Write   3.Primary School(1-8)  4.Secondary School (9-12)  5.College And Above |  |
| 108 | Mother’s occupational status | 1.Housewife  2.GovernmentEmployee  3.Fsarmer  4.Daily Labour  5.Merchant  6.NGO Employee  7. Other (Specify)…… |  |

**Part II. Maternal related factors**

| **No** | **Questions** | **Response** | **Remark** |
| --- | --- | --- | --- |
| 201 | Did you take iron during your pregnancy? | 1. Yes  2. No | If no skip to  Qn 3 |
| 202 | If yes? For how many days? | 1.--------------------------- |  |
| 203 | How many months have been passed just after your previous pregnancy? | 1. ----------------------------- |  |
| 204 | How many times have you been conceived (including the current pregnancy) | 1---------------------------------- |  |
| 205 | How many times did you give birth?(including the current) | 1. ------------------- |  |
| 206 | Did you have ANC follow-up during your pregnancy? | 1. Yes  2. No | If no skip to  Qn 8 |
| 207 | If yes? How frequent? | 1--------------------------------- times |  |
| 208 | Have you ever been experienced the following illnesses (select all that apply) | 1. Gestational diabetes mellitus (GDM) 2. Pregnancy-induced hypertension (PIH) 3. Others(specify__________) 4. none |  |
| 209 | Was the current pregnancy wanted? | 1. Yes  2.No |  |
| 210 | Was the current pregnancy planned? | 1. Yes  2. No |  |

**Part III: Environmental related factors**

| **No.** | **Questions** | **Responses** | |  |
| --- | --- | --- | --- | --- |
| 301. | In which season have you conceived the current pregnancy? | 1.  2. | Belg(spring)  Kiremt (rainy) |  |
|  |  | 3. | Bega (winter) |  |
|  |  | 4. | Meher (autumn) |  |
| 302. | Have you been exposed to indoor fire smoking in current pregnancy? | 1.  2. | Yes  No |  |

**Part IV: Household wealth index related characteristics**

| **No.** | **Questions** | **Response** |  |
| --- | --- | --- | --- |
| WI401 | For whom the house you live in belongs to? | 1.Private  2.Rented from individual  3.Others (specify)___________ |  |
| WI402 | How many rooms does your house have? | ____________in number |  |

| WI403 | From which material your house floor made in? | 1.Ceramic /tile  2. Cement  3 .Carpet   1. Dung 2. Earth / Sand Carpet   6.Others (specify)__________ |  |
| --- | --- | --- | --- |
| WI404 | From which material your house roof made in? | 1. Iron corrugated sheet 2. Bamboo 3. Wood 4. Thatch   Others (specify)__________ |  |
| WI405 | From which material your house’s exterior wall is made in? | 1. Stone with cement  2.Stone with mud  3. Wood with mud  4.Others (specify)__________ |  |
| WI406 | What type of fuel mainly used for household cooking? | 1. Electricity 2. Charcoal 3. Wood 4. Animal dung   5.Others(specify)___________ |  |
| WI407 | Where cooking usually done? | 1. In a separate building  Outdoors  2.In a separate room used as a  kitchen |  |

|  |  | 3.Elsewhere in the house  4.Other (*specify*)___________ | |  |
| --- | --- | --- | --- | --- |
| WI408 | Does any member of the household own any land that can be used for agriculture? | 1. Yes 2. No | |  |
| WI409 | Ownership of the farmland (if the household doesn’t have one of the two option, use) | 1.Own, in hectares/gemed____  2.Rent, in hectares/gemed____ | |  |
| WI410 | How many tones of agricultural products (includes all items) you produce annually? | ______________tone | |  |
| WI411 | Does your household have  Electricity?  A Radio?  Television?  A Non-mobile telephone?  A Refrigerator?  Table?  Chair?  A bed with cotton/spring mattress | Yes    1  1  1  1  1 | No    2  2  2  2  2 |  |
|  |  | 1 | 2 |  |
|  |  | 1 | 2 |  |
|  |  | 1 | 2 |  |
| WI412 | Does any member of your household own    A watch? | Yes | No |  |

|  | A mobile phone?    A bicycle?    A Bajaj?    Animal drawn cart?    Car? | 1  1  1  1  1  1 | 2  2  2  2  2  2 |  |
| --- | --- | --- | --- | --- |
| WI413 | Does this household own any livestock, herds, other farm animals, or poultry? | Yes  No |  |  |
| WI414 | How many of the following animals does the household have? |  |  |  |
| Cattle, milk cows, bulls? ( in number) | _________ |  |  |
| Horses, Donkeys, or mules? (in number) | _________ |  |  |
| Goats? (in number) | _________ |  |  |
| Sheep? ( in number) | _________ |  |  |
| Chickens? ( in number) | _________ |  |  |
| Beehives( in number) | _________ |  |  |
| WI415 | Does any member of this household have money in the bank Birr (ETB) if yes how much? | ---------------------- |  |  |

**Part V. Maternal anthropometric measurements**

501. Height (cm) ------------------------------------

502. MUAC (cm) ----------------------

503. Hemoglobin _________g/dl

**Part VI:** **Newborn’s sociodemographic and anthropometric measurements**

1. Sex 1. Male 2.female
2. Gestational age -------------------- (weeks)
3. Birth weight (in gram) ------------ 604. Length (cm) ----------------------
4. Birth status 1. Single birth 2. Twin 3. Multiple births

Name of data collector ____________________ sign ________ date_______ Name of supervisor ______________________ sign _________ date _______

**ነርስ ትምህርት ቤት**

**የጨቅላ ህጻናት ነርስ ትምህርት ክፍል**

*ማሳሰቢያ፡-*

የጥያቄዎቹን ክፍት ቦታዎች በትክክል መሞላቱን እና አማራጭ ያላቸዉን እንደ አስፈላጊነታቸዉ አንድ ወይም ከዚያን በላይ ምላሾች መክበብዎን አረጋግጧል ።

በመጨረሻም ከሚዘለሉት መጠይቆች በስተቀር ሁሉም መሞላታቸዉን ማረጋገጥ እና በመጠይቁ ለተሳተፉ አካላት ምስጋና አቅርቧል!!!

መጠይቁን የሚሰበስበዉ ሰዉ ስም -------------------------------------ፊርማ----------------------ቀን--------------------

የተቆጣጣሪው ሙሉ ስም------------------------------------------------ፊርማ---------------------ቀን--------------------

የመጠይቁ ኮድ ---------------------------------

| ተ.ቁ | ጥያቄዎች | አማራጭ መልሶች(መልሱን ያክቡ) | ተጨማሪ |
| --- | --- | --- | --- |
| ክፍል 1.ማህበራዊ፤ኢኮኖሚያዊ እና ስነ-ህዝባዊ መረጃን በተመለከተ ዳሰሳ | | | |
| 101 | ዕድሜ | …………/…………/……በአመት |  |
| 102 | ሃይማኖት | 1. ኦድቶዶክስ  2. ሙስሊም  3. ካቶሊክ  4. ፕሮቴስታንት  5. ሌላ ካለ(ይገለጥ) |  |
| 103 | የመኖሪያ አድራሻ | 1.ከተማ  2.ገጠር |  |
| 104 | ብሄር | 1. አማራ  2. ኦሮሞ  3. ትግሬ  4. ሌላ...... |  |
| 105 | የጋብቻ ሁኔታ | 1. ያገባች  2. ያላገባች  3. የፈታች  4. ባልየሞተባት  5. የተለያየች |  |
| 106 | የአባት የትምህርት ደረጃ | 1. ማንበብና መጻፍ የማይችል  2. ማንበብና መጻፍ የሚችል  3. የመጀመሪያ ደረጃ የጨረሰ(1-8)  4. ሁለተነኛ ደረጃ የጨረሰ(9-12)  5. ኮሌጅና ከዚያ በላይ |  |
| 107 | የእናት የትምህርት ደረጃ | 1. ማንበብና መጻፍ የማትችል  2. ማንበብና መጻፍ የምትችል  3. የመጀመሪያ ደረጃ የጨረሰች(1-8)  4. ሁለተነኛ ደረጃ የጨረሰች(9-12)  5. ኮሌጅና ከዚያ በላይ |  |
| 108 | የእናት የስራ ሁኔታ | 1. የመንግሰት ሰራተኛ  2. የቤት እመቤት  3. የቀን ሰራተኛ  4. ነጋዴ  5.መንግስታዊ ያልሆነ ድርጅት ሰራተኛ  6. ሌላ ካለ ይገለጥ... |  |

ክፍል ሁለት ከእናቶች ጋር የተዛመደ መጠይቅ

| N | ጥያቄዎች | መልስ | ተጨማሪ |
| --- | --- | --- | --- |
| 9200 | በእርግዝናዎ ወራት ኦይረን ተጠቅመው ነበር? | 1. አዎ. 2 የለም | የለም ካሉ ወደ ቁጥር 3 ይለፉ |
| 0201 | ለስንት ቀን ወስደዋል? | 1.--------------------------- |  |
| 9202 | በመጀመሪያ ልጅዎና በአሁኑ መካክል ያለው ወራት ስንት ነው? | 1. ------------------------------ |  |
| 9203 | የእርግዝና ብዛት | 1.------------------- |  |
| 2204 | የተወለዱት ህጻናት ብዛት? | 1. ------------------- |  |
| 9205 | የእርግዝና ክትትል ነበረዎት? | 1. አዎ 2. የለም | የለም ካሉ ወደ ቁጥር 7 ይለፉ |
| 0207 | ስንትጊዜ ተክታትለዋል? | 1.  2.  3.  4 |  |
| 9208 | በእርግዝናዎጊዜ ታመው ነበር? | 1.አዎ 2. የለም | ክሌለ ወደ 9 ቁጥር ይልፉ |
| Q209 | የህመምዎ አይነት ምን ነበር? | 1. በእርግዝና ጊዜ የተክሰተ የስኳር ብሸታ  2. በእርግዝና ምክኒያት የተክሰተ የደም ግፊት  3.ሌሎች  4.የለም |  |
| 2210 | በፍላጎትዎ ነበር ያረገዙት | 1. አዎ 2.አይደለም |  |
|  | እርግዝናዎ የታቀደ ነበር | 1. አዎ 2. አይደለም |  |

ክፍል አራት ከአካባቢ ጋር የተዛመደ መጠይቅ

|  | **ቅጥያቄዎች** | **መልስ** | |  |
| --- | --- | --- | --- | --- |
| 301. | የጸነሱበት ወቅት መቼ ነበር? | 1. በጋ 2. ጸደይ 3. ክረምት 4. መኸር |  |  |
|  |  |  |  |  |
| 302. | በአሁኑ እርግዝናዎ ጊዜ ለቤት ውስጥ ጭስ ተጋልጠው ነበር? | 1.  2. | አዎ  የለም |  |

**ክፍል አራት የሀብት መረጃ ጠቋሚ ጥያቄዎች**

| WI401. | የሚኖሩበት ቤት ባለቤትነቱ የማን ነው? | 1. የግሌ 2. የክራይ 3. ሌከላ ካለ ይጥቀሱ--------- |
| --- | --- | --- |
| WI402. | የሚኖሩበት ቤት ስንት ክፍል አለው? | ------------------በቁጥር |
| WI403. | የመኖሪያ ቤትዎ ወለሉ ከምን የተሰራ ነው? | 1. ሴራሚክ 2. ከስሚንቶ 3. ስጋጃ ምንጣፍ 4. በበት የተለቀለቀ 5. አፈር/አሸዋ 6. ሌላ ካለ ይጥቀሱ |
| WI404. | የመኖሪያ ቤትዎ ጣርያው ከምን የተሰራ ነው? | 1. ከብረት/ቆርቆሮ 2. ከሸንበቆ 3. ከእንጨት 4. የሳር ክዳን 5. ሌላ ካለ ይጥቀሱ---------- |
| WI405. | የመኖሪያ ቤትዎ ውጨኛው ግድግዳ ከምን የተሰራ ነው? | 1. ከድንጋይ እና ስሚንቶ 2. ከድንጋይ እና ጨቃ 3. እነጨት እና ጨቃ 4. ሌላ ካለ ይጥቀሱ--------- |
| WI406. | ከቤት ምግብ ለማብሰል ሚጠቀሙት ምንድን ነው? | 1. ኤሌክትሪክ 2. ከሰል 3. እንጨት 4. የከብት ፍግ 5. ሌላ ካለ ይጥቀሱ---------- |
| WI407. | ምግብ ሚያበስሉበት ቦታ የት ነው? | 1. የራሱ የሆነ ጨስ ቤት 2. ማድ ቤት(ቤት ውስጥ) 3. ቤት ውስጥ የትም ቦታ 4. ሌላ ካለ ይጥቀሱ--------- |
| WI408. | ምን ያህል ቃዳ መሬት አለዎት? | ______________ |
| WI409. | በአመት ውስጥ ከጠቅላላ የእህል አይነቶች ምን ያህል ኩንታል ያመርታሉ | __________ኩንታል |
| WI410. | ከሚከተሉት ውስጥ ቤትዎ ውስጥ ያለውን ሁሉ ይጥቀሱ   1. መብራት 2. ራዲዮ 3. ቴሌቪዠን 4. ቤት ስልክ 5. ፍሪጅ 6. ጠረጴዛ 7. ወንበር 8. አልጋ ከስፖንጅ ፍራሽ ጋር | አዎ የለም    1 2  1 2  1 2  1 2  1 2  1 2  1 2  1 2 |
| WI411. | ከሚከተሉት ውስጥ ቤትዎ ውስጥ ያለውን ሁሉ ይጥቀሱ   1. ሰአት 2. ሞባይል 3. የቤት ስልክ 4. ባጃጅ 5. ጋሪ 6. መኪና | አዎ የለም    1 2  1 2  1 2  1 2  1 2  1 2 |
| WI412. | ከቤትዎ ውስጥ ከብት፣ዶሮ እና በሬ አለዎት? | 1. አዎ 2. የለኝም |
| WI413. | ለተ.ቁ. 413 መልስዎ አዎ ከሆነ በቁጥር ይጥቀሱ |  |
|  | 1. ላምና በሬ | ____________በቁጥር |
|  | 1. የጋማ ከብተ | ____________በቁጥር |
|  | 1. ፍየል | ____________በቁጥር |
|  | 1. በግ | ____________በቁጥር |
|  | 1. የዶሮ ጫጩት | ____________በቁጥር |
|  | 1. የንብ ቀፎ | ____________በቁጥር |
| WI414. | ከባንክ ቤት ስንት ብር አለዎት? | ____________ብር |

**ክፍል አምስት የእናት ና የጨቅላ** ህጻን አንትሮፖሜትሪክ ልኬት

501.የእናት ቁመት በሴንቲ ሜትር-----------

502. የእናት ክንድ ዙሪያ ስፋት በሴንቲ ሜትር---------------

503. የቀይ ደም ህዋስ ልኬታ------------------

ክፍል ስድስት የጨቅላ ህጻን ማህበራዊ እና አንትሮፖሜትሪክ ልኬት

601.ጾታ ወንድ.....................ሴት..................

602. የልደት ሁኔታ አንድ ሁለት ከሁለት በላይ

603. የእርግዝና ጊዜ በሳምንት--------------------

604. የጨቅላ ህጻን ክብደት በ ግራም ----------------------

605. የጨቅላ ህጻን ቁመት በሴንቲ ሜትር ------------------

***እናመሰግናለን!***
